# Supplementary material for: Syntrophic Butyrate-Oxidizing Consortium Mitigates Acetate Inhibition through a Shift from Acetoclastic to Hydrogenotrophic Methanogenesis and Alleviates VFA Stress in Thermophilic Anaerobic Digestion
Source: MDPI journal article supplement (doi:10.3390/app13010173), 2022-12-23
Supplement: s1 [file s1]

**Table S1.** Phylogenetic affiliation and relative abundance of bacterial and archaeal 16S rRNA gene sequences retrieved from the clone libraries.

| Phylogenetic group                              | Relative abundance, % |         | The most similar sequence                                       |               |
|-------------------------------------------------|-----------------------|---------|-----------------------------------------------------------------|---------------|
|                                                 | day 20                | day 120 | Closest relative species                                        | Similarity, % |
| Archaea                                         |                       |         |                                                                 |               |
| <i>Methanosaeta</i><br>( <i>Methanotherix</i> ) | 4.3                   | 0.0     | <i>Methanosaeta thermophila</i> PT                              | 95.8          |
| <i>Methanosarcina</i>                           | 86.0                  | 25.0    | <i>Methanosarcina thermophila</i> TM-1                          | 100.0         |
| <i>Methanomassiliicoccus</i>                    | 3.2                   | 21.9    | <i>Methanomassiliicoccus luminyensis</i><br>B10                 | 95.7          |
| <i>Methanothermobacter</i>                      | 3.2                   | 53.1    | <i>Methanothermobacter</i><br><i>thermautotrophicus</i> Delta H | 100.0         |
| <i>Thermoprotei</i>                             | 2.2                   | 0.0     | <i>Thermofilum uzonense</i> 1807-2                              | 83.2          |
| Bacteria                                        |                       |         |                                                                 |               |
| <i>Thermacetogenium</i>                         | 5.1                   | 7.1     | <i>Thermacetogenium phaeum</i> DSM<br>12270                     | 97.1          |
| <i>Syntrophaceticus</i>                         | 30.4                  | 42.9    | <i>Syntrophaceticus schinkii</i> Sp3                            | 96.4          |
| <i>Syntrophomonas</i>                           | 2.5                   | 26.2    | <i>Syntrophomonas wolfei</i> DSM 4212                           |               |
| <i>Firmicutes</i>                               | 2.5                   | 26.2    | <i>Hydrogenispora ethanolica</i> LX-B                           | 87.6          |
| <i>Anaerobaculum</i>                            | 38.0                  | 14.3    | <i>Anaerobaculum hydrogeniformans</i><br>OS1                    | 100.0         |
| <i>Atribacteria</i>                             | 1.3                   | 2.4     | <i>Caldanaerobacter subterraneus</i> DSM<br>13054               | 81.2          |
| <i>Tepidiphilus</i>                             | 2.5                   | 0.0     | <i>Tepidiphilus margaritifer</i> N2-214                         | 99.4          |
| <i>Anaerolineae</i>                             | 15.3                  | 7.1     | <i>Thermanaerotherix daxensis</i> GNS-1                         | 96.0          |
| <i>Mesotoga</i>                                 | 1.3                   | 0.0     | <i>Mesotoga infera</i> VNs100                                   | 99.9          |
| <i>Thermotoga</i>                               | 1.3                   | 0.0     | <i>Pseudothermotoga profunda</i><br>AZM34c06                    | 97.4          |
